# Supplementary figures and images for: Fibroblast Growth Factor Receptor Inhibitors Decrease Proliferation of Melanoma Cell Lines and Their Activity Is Modulated by Vitamin D
Source: MDPI journal article supplement (doi:10.3390/ijms25052505), 2024-02-21

**A**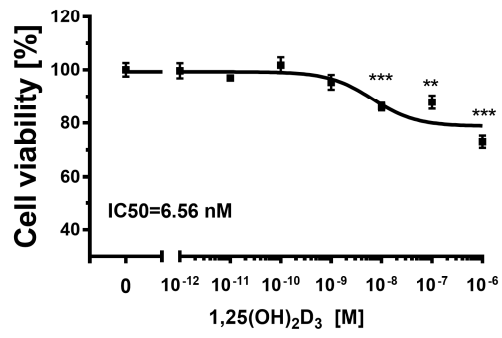**B**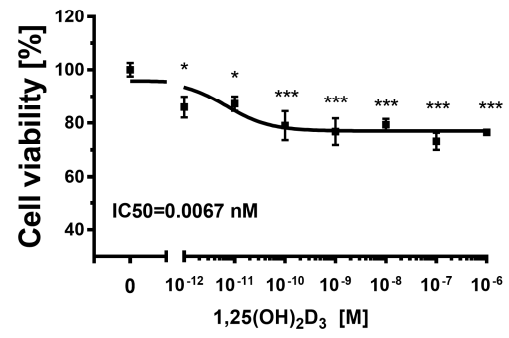

**Figure S1.** Effect of 1,25(OH)<sub>2</sub>D<sub>3</sub> on viability of RPMI7951 melanoma. \*  $p < 0.05$ , \*\*  $p < 0.01$ , \*\*\*  $p < 0.001$ .

Supplement: s1 [file s1]
